# Supplementary material for: Implementation of a Satellite-Based Tool for the Quantification of CH 4 emissions over Europe (AUMIA v1.0) – Part 1: Forward Modeling Evaluation against Near-Surface and Satellite Data
Source: Copernicus journal article supplement (doi:10.5194/gmd-2023-9), 2023-03-16
Supplement: Supplementary file [file gmd-2023-9-AC3-supplement.pdf]

## **Response to the Anonymous Referee #1**

Ref.: GMD-2023-9 | Model evaluation paper

### **Inverse Modeling of CH<sub>4</sub> emissions over Europe, Part I: Forward Modeling Evaluation against Near-Surface and Satellite Data**

First of all, we want to thank the anonymous referee for the appropriate and constructive comments which helped to clarify some points regarding the model-observation differences and why we decided to split the work and submit the forward modeling component as a first part paper. In order to facilitate the identification of actions for each reviewer's comments, we copied the comments in *italics* and set the answers in **bold**. All the manuscript modifications are indicated in **blue**.

#### **General comments:**

*My main concern with this work is that it intends to introduce a new inversion framework for TROPOMI CH<sub>4</sub> data, itself somewhat incremental, but the authors have decided to split the paper in to 2 parts. With this first part only concerning the forward model, it is difficult to assess and explain the differences compared to observations. The forward model fails to capture the variability observed by the ground-based ICOS network and also fails to match the satellite total column observations. The issues may be with the prior as the authors suggest (and which would be demonstrated by actually showing the inversion results) but when the authors apply the averaging kernels (as should be done), this “smoothing” effect leads to much poorer comparisons and there’s not a sufficient explanation for this.*

*Unfortunately I believe that the attempt to split the paper into two has led to this first part being particularly weak and lacking. There's clearly significant work that has gone in to this study but I would recommend that the authors consider publishing it as a whole, therefore being able to back up their speculation with quantitative inversion results.*

**We agree that it is difficult to assess and explain the model-observation differences, and also that the model fails to capture the ground-based ICOS and TROPOMI observations. This is basically why inverse modeling systems need to be either developed or constantly improved. Even comprehensive global forecasting systems such as the CAMS system (<https://global-evaluation.atmosphere.copernicus.eu/ch4/ghg/insitu-icos>) do predict methane discrepancies on the order of 100-300 ppb for the same ICOS stations we used in the model evaluation (see a brief discussion on this in the manuscript lines 412-417). In addition, the domain-wide correlation coefficients (0.4–0.5) and root-mean-square errors (27–30 ppb) we obtained for XCH<sub>4</sub> (taking into account the smoothing effect) are in line with previous studies conducted over specific locations in Central Europe (e.g. Zhao et al., 2019, 2022; Tsuruta et al., 2023).**

**The fact that the smoothing effect leads to a much poorer comparisons has also been discussed on the manuscript lines 513-522. The lower differences between the satellite estimates and the simulated concentrations without smoothing are related to an artificial methane offset. This methane offset is a result of not integrating the atmospheric layer above the model top (~1hPa), thus lowering the total-column concentrations artificially. Compared to the case without smoothing, the simulated concentrations with smoothing take into account the atmospheric layer above the model top and thus higher total-column concentrations are expected in this case. It is worth reminding that in order to compare methane profiles from atmospheric models against satellite estimates, the model profiles need to be previously smoothed using the a priori**

information and averaging kernels from the satellite retrievals. The smoothing effect is not usually included as part of model evaluation in methane modeling papers; however, we do believe that including a discussion on this effect is relevant to the modeling community.

With all of the state-of-the-art modeling tools and improved TROPOMI observations that have been applied for evaluating methane concentrations over Europe, but, most importantly, the consistent results (together with a better understanding of how to handle TROPOMI observations) achieved at this first stage, we disagree that our manuscript is weak and lacking. We understand the reviewer's point of view that publishing the modeling system as a whole would be better, especially considering that the inversion part by itself captures much more attention than forward simulations; however, we do think that gradual dissemination of findings and contributions can establish a foundation for subsequent parts. Submitting a forward modeling evaluation paper first will allow us to receive timely feedback and suggestions that can inform any necessary improvements or modifications that need to be made before delving into further aspects of the backward modeling part (e.g. by identifying the problem with not including the top layer in the integration, which the inversion part would likely just have solved by adjusting the state vector).

Tsuruta, A. et al.: CH<sub>4</sub> Fluxes Derived from Assimilation of TROPOMI XCH<sub>4</sub> in CarbonTracker Europe-CH<sub>4</sub>: Evaluation of Seasonality and Spatial Distribution in the Northern High Latitudes, *Remote Sensing*, 15, 1620, doi:10.3390/rs15061620, 2023.

Zhao, X. et al.: Understanding greenhouse gas (GHG) column concentrations in Munich using WRF, *Atmos. Chem. Phys.*, doi:10.5194/acp-2022-281, 2022.

**Zhao, X. et al.: Analysis of total column CO<sub>2</sub> and CH<sub>4</sub> measurements in Berlin with WRF-GHG, Atmos. Chem. Phys., 19, 11279-11302, 2019.**

**Specific comments:**

*Abstract: The authors appear to very strongly oversell their work with the statement that “The results found in this study contribute with a new model evaluation of methane concentrations over Europe, and demonstrate a huge and under explored potential for methane inverse modeling using improved TROPOMI products in large-scale applications.” Inverse modelling of methane is a very active area with a strong track record from a number of European groups. Many groups have published inversion results using TROPOMI data and indeed, there are large European projects in this area.*

**We agree that inverse modeling of methane is a very active area and that there are large European projects in this area. In line with those projects, the second part of this work will represent a first effort in years to update the methane emission estimates for Denmark. The sentence “The results found in this study contribute with a new model evaluation of methane concentrations over Europe” is true in the sense that new EDGAR emission estimates (Ferrario et al., 2021) together with improved TROPOMI observations (Lorente et al., 2022) were used to evaluate the methane concentrations over Europe. Regarding the sentence “and demonstrate a huge and under explored potential for methane inverse modeling using improved TROPOMI products in large-scale applications”, it can be supported by the domain-wide statistical metrics which are in line with previous studies conducted over specific locations in Central Europe (e.g. Zhao et al., 2019, 2022; Tsuruta et al., 2023). The more satellite observations are improved, the more accurate the inversion estimates tend to be. Also, the term “and under explored” has been removed to not insinuate the TROPOMI data we used here**

have been available for so long and that even so it's been under explored. Also, the proper EDGARv6.0 reference is now included in the manuscript.

“Anthropogenic fluxes of CH<sub>4</sub> (not including biomass burning sources) are externally prepared based on the Emissions Database for Global Atmospheric Research (EDGAR) version 6 Greenhouse Gas Emissions (Crippa et al., 2021).” → “Anthropogenic fluxes of CH<sub>4</sub> (not including biomass burning sources) are externally prepared based on the Emissions Database for Global Atmospheric Research (EDGAR) version 6 Greenhouse Gas Emissions (Ferrario et al., 2021).”

Ferrario, M. et al.: EDGAR v6.0 Greenhouse Gas Emissions. European Commission, Joint Research Centre (JRC) [Dataset] PID: <http://data.europa.eu/89h/97a67d67-c62e-4826-b873-9d972c4f670b>

Lorente, A. et al.: Evaluation of the methane full-physics retrieval applied to TROPOMI ocean sun glint measurements, *Atmos. Meas. Tech.*, 15, 6585-6603, 2022.

Tsuruta, A. et al.: CH<sub>4</sub> Fluxes Derived from Assimilation of TROPOMI XCH<sub>4</sub> in CarbonTracker Europe-CH<sub>4</sub>: Evaluation of Seasonality and Spatial Distribution in the Northern High Latitudes, *Remote Sensing*, 15, 1620, doi:10.3390/rs15061620, 2023.

Zhao, X. et al.: Understanding greenhouse gas (GHG) column concentrations in Munich using WRF, *Atmos. Chem. Phys.*, doi:10.5194/acp-2022-281, 2022.

Zhao, X. et al.: Analysis of total column CO<sub>2</sub> and CH<sub>4</sub> measurements in Berlin with WRF-GHG, *Atmos. Chem. Phys.*, 19, 11279-11302, 2019.

*L65 – This ignores some of the TIR instruments that measure CH<sub>4</sub>, IASI being maybe the most relevant here. Some mention of these should be made and then an explanation on why the focus is on the SWIR instruments.*

**The second paragraph in the introduction section describes what satellite platforms have been mostly used for evaluating methane simulations, and also mentions the platforms that are still in operation. In the case of IASI, it has been mostly used for evaluating carbon monoxide and ozone simulations, with just a few studies on methane having been reported. Anyway, we agree that it is worth including IASI in the introduction section:**

**“Such comparative studies have focused mostly on CH<sub>4</sub> column-averaged dry air mole fractions (hereafter referred to as XCH<sub>4</sub> concentrations) from the SCanning Imaging Absorption spectroMeter for Atmospheric ChartographY (SCIAMACHY) and Thermal And Near-infrared Sensor for carbon Observation (TANSO) instruments onboard the Environmental Satellite (EnviSat) and Greenhouse gases Observing SATellite (GOSAT), respectively.” → “Such comparative studies have focused mostly on CH<sub>4</sub> column-averaged dry air mole fractions (hereafter referred to as XCH<sub>4</sub> concentrations) from the SCanning Imaging Absorption spectroMeter for Atmospheric ChartographY (SCIAMACHY), Thermal And Near-infrared Sensor for carbon Observation (TANSO), and Infrared Atmospheric Sounding Interferometer (IASI) onboard the Environmental Satellite (EnviSat), Greenhouse gases Observing SATellite (GOSAT), and Meteorological Operational (Metop-A -B and -C) satellites, respectively.”**

**“TANSO provides more mature but sparser XCH<sub>4</sub> concentrations than TROPOMI, and is together with TROPOMI the only two satellite instruments that remain operational since they were launched in 2009 and 2017, respectively.” → “TANSO and IASI provide**

more mature but sparser XCH<sub>4</sub> concentrations than TROPOMI, and are together with TROPOMI the only three satellite instruments that remain operational since they were launched in 2009, 2012 (Metop-B) and 2017, respectively.”.

**There is no actually a specific reason why we selected a SWIR instrument, but taking advantage of a much more sparser and high-resolution XCH<sub>4</sub> product.**

*L74: Tsuruta et al. (2023) would appear to be a very relevant reference, given it involves TROPOMI inversions over Europe, that is omitted. Some discussion of how this work relates/compares to that should be undertaken.*

**This work had not been included in the discussion section because it was not available by the time when we submitted our manuscript to GMD. New discussions on Tsuruta et al. (2023) results have now been included in several parts throughout the manuscript.**

**“...anthropogenic sources. No inverse modeling studies of CH<sub>4</sub> emissions based entirely on EDGARv6.0 for anthropogenic sources have been conducted over Europe. However, a recent inversion approach for CH<sub>4</sub> emissions over China...” → “...anthropogenic sources. Using EDGARv6.0 CH<sub>4</sub> fluxes as the a priori emission estimates and two sets of TROPOMI-based XCH<sub>4</sub> observations, the global inversion approach conducted by Tsuruta et al. (2023) showed that over central Europe the anthropogenic CH<sub>4</sub> emissions would be slightly overestimated, mainly during spring and autumn. However, higher emission estimates are otherwise found when ground-based data is used to drive the inversion estimates. The inversion approach for CH<sub>4</sub> emissions over China...”**

**“XCH<sub>4</sub> signals from natural sources (wetlands and termites) and biomass burning were not relevant during the study period. According to Kaplan (2002), potential natural wetlands in the 30 km modeling domain concentrate over the Baltic countries, Belarus and western regions of Russia. Among the factors that could have negatively influenced**

the accumulation of biospheric CH<sub>4</sub> in the atmosphere over the study region are: a less CH<sub>4</sub> formation tied to the extremely dry season in summer 2018 over central and northern Europe (Rousi et al., 2022); a CH<sub>4</sub> compensation by soil uptake processes; and transport mechanisms.” → “XCH<sub>4</sub> signals from natural sources (wetlands and termites) and biomass burning were not relevant during the study period. The inversion estimates conducted by Tsuruta et al. (2023) showed that, compared to the anthropogenic emissions, the wetland emissions over central Europe are small, mainly during summer months when biogenic fluxes reached their minimum values. According to Kaplan (2002), potential natural wetlands in the 30 km modeling domain concentrate over the Baltic countries, Belarus and western regions of Russia. Among the factors that could have negatively influenced the accumulation of biospheric CH<sub>4</sub> in the atmosphere over the study region are: a less CH<sub>4</sub> formation tied to the extremely dry season in summer 2018 over central and northern Europe (Rousi et al., 2022); a CH<sub>4</sub> compensation by soil uptake processes as the fluxes are dominated by mineral soils which are mostly net sink of CH<sub>4</sub> (Tsuruta et al., 2023); and transport mechanisms.”

**Kaplan, J. O.: Wetlands at the last Glacial Maximum: Distribution and methane emissions, Geophys. Res. Lett., 29, 1079, 2002.**

**Rousi, E. et al.: The extremely hot and dry 2018 summer in central and northern Europe from a multi-faceted weather and climate perspective, EGU sphere, doi:10.5194/egusphere-2022-813, 2022.**

**Tsuruta, A. et al.: CH<sub>4</sub> Fluxes Derived from Assimilation of TROPOMI XCH<sub>4</sub> in CarbonTracker Europe-CH<sub>4</sub>: Evaluation of Seasonality and Spatial Distribution in the Northern High Latitudes, Remote Sensing, 15, 1620, doi:10.3390/rs15061620, 2023.**



*L98: “carefully selected” – How? Why? What criteria?*

**The main criteria for selecting the two-week periods for model sensitivity tests was to have at least 75 % of days with TROPOMI data covering large portions of Europe. Large numbers of observation/model pairs (that spread out across the modeling domain) allow to perform a more representative domain-wide statistical evaluation. The one-year period from April 01, 2018 to March 31, 2019 was selected because of the following reasons: 1) availability of TROPOMI operational data and the improved TROPOMI data from March 2018 onwards; 2) evaluate the most recent EDGARv6.0 emissions for methane (2018); and 3) avoid sustained irregular scenarios in terms of emissions, e.g., fire outbreaks in most part of 2019 and emission reductions associated with COVID-19 lockdowns in 2020 and 2021, both at global scale. The 2018 summer was particularly interesting to focus on because of the larger than average number of cloud-free days over Denmark and most part of Europe.**

*L100: I think there needs to be a strong justification for doing this as a 2-part paper and I'm struggling to see why it needed to be split. Can the authors please expand upon the rationale for this.*

**As previously mentioned, we understand the reviewer's point of view that publishing the modeling system as a whole would be better, especially considering that the inversion part by itself captures much more attention than forward simulations; however, we do think that gradual dissemination of findings and contributions (e.g. satellite data exploration) can establish a foundation for subsequent parts. Submitting a forward modeling evaluation paper first will allow us to receive timely feedback and suggestions that can inform any necessary improvements or modifications that need to be made before delving into further aspects of the backward modeling part (e.g. by**

identifying the problem with not including the top layer in the integration, which the inversion part would likely just have solved by adjusting the state vector).

A few modeling studies using WRF-GHG and methane observations over Europe have been conducted in recent years (e.g. Zhao et al., 2019, 2022; Galkowski et al., 2020), most of them using ground-based (e.g. ICOS) and column (e.g. TCCON) observations. In our manuscript, we evaluate simulated XCH<sub>4</sub> concentrations resulted from the coupling of a number of atmospheric models against improved TROPOMI observations (Lorente et al., 2022). This new TROPOMI data set was made publicly to the community during the second half of 2022 which means that its use has not been extensively explored. The domain-wide correlation coefficients (0.4–0.5) and root-mean-square errors (27–30 ppb) that we obtained for XCH<sub>4</sub> (taking into account the smoothing effect) using this new product are in line with previous studies conducted over specific locations in Central Europe (e.g. Zhao et al., 2019, 2022; Tsuruta et al., 2023).

The second paper will not only focus on the backward component but will also include a first methane emission estimates for Denmark and subsequent comparison against cloud-based products such as the Integrated Methane Inversion (IMI) v1.0 (Varon et al., 2022). As implementing inversion systems based on satellite platforms requires a lot of work and time, publishing the system's core components in companion papers allows a convenient way to disseminate such systems throughout the process.

Galkowski, M. et al.: Estimating emissions of methane and carbon dioxide sources using analytical Bayesian inversion system based on WRF-GHG tagged tracer simulations, EGU General Assembly, doi:10.5194/egusphere-egu2020-16082, 2020.

Lorente, A. et al.: Evaluation of the methane full-physics retrieval applied to

**TROPOMI ocean sun glint measurements, Atmos. Meas. Tech., 15, 6585-6603, 2022.**

**Tsuruta, A. et al.: CH<sub>4</sub> Fluxes Derived from Assimilation of TROPOMI XCH<sub>4</sub> in CarbonTracker Europe-CH<sub>4</sub>: Evaluation of Seasonality and Spatial Distribution in the Northern High Latitudes, Remote Sensing, 15, 1620, doi:10.3390/rs15061620, 2023.**

**Varon, D. J. et al.: Integrated Methane Inversion (IMI 1.0): a user-friendly, cloud-based facility for inferring high-resolution methane emissions from TROPOMI satellite observations, Geosci. Model Dev., 15, 5787-5805, 2022.**

**Zhao, X. et al.: Understanding greenhouse gas (GHG) column concentrations in Munich using WRF, Atmos. Chem. Phys., doi:10.5194/acp-2022-281, 2022.**

**Zhao, X. et al.: Analysis of total column CO<sub>2</sub> and CH<sub>4</sub> measurements in Berlin with WRF-GHG, Atmos. Chem. Phys., 19, 11279-11302, 2019.**

*L170: Do these “agricultural” fluxes include rice production? This is usually separate and somewhat complex given the overlap with naturally inundated areas.*

**Yes, EDGARv6.0 has dedicated special effort in including seasonal profiles for the rice cultivation sector. The recent Rice Atlas produced by the International Rice Research Institute (IRRI) (Laborte et al., 2017), which provides a comprehensive rice calendar with monthly specification at country to sub-country level, is already taken into account by EDGAR.**

**Laborte, A. G. et al.: Rice Atlas, a spatial database of global rice calendars and production, Scientific Data, 4, 170074, doi:10.1038/sdata.2017.74, 2017.**

*L213: Is Sitch 2003 the correct reference? It makes no mention of methane nor wetlands...  
More details are needed here as to how the wetland CH<sub>4</sub> fluxes are derived.*

**In WRF-GHG, the approach of Sitch et al. (2003) is used to estimate the carbon decomposition rate based on WRF predicted fields of soil moisture and temperature. The carbon decomposition rate is then used to estimate the amount of heterotrophic respiration. Finally, the methane fluxes from wetlands are determined as a percentage of the heterotrophic respiration following the approaches of Christensen et al. (1996) and Kaplan et al. (2002).**

**“CH<sub>4</sub> fluxes from wetlands are determined as a percentage of the heterotrophic respiration (Christensen et al., 1996) using the approach of Sitch et al. (2003) and the WRF-GHG variables soil moisture and soil temperature. A wetland inundation map (Kaplan et al., 2002) is then applied for the determination of the wetland fraction per grid cell. CH<sub>4</sub> fluxes from termites...” → “CH<sub>4</sub> fluxes from wetlands are based on the wetland model developed by Kaplan (2002). This model is based on a diagnostic approach that determines CH<sub>4</sub> emissions from wetlands as a percentage of the heterotrophic respiration following the approach of Christensen et al. (1996). The heterotrophic respiration is previously calculated based on the carbon decomposition rate following the approach of Sitch et al. (2003), with the soil moisture and soil temperature being inferred from the WRF model. CH<sub>4</sub> fluxes from termites...”**

**Kaplan, J. O.: Wetlands at the last Glacial Maximum: Distribution and methane emissions, *Geophys. Res. Lett.*, 29, 1079, 2002.**

**Sitch, S. et al.: Evaluation of ecosystem dynamics, plant geography and terrestrial carbon cycling in the LPJ dynamic global vegetation model, *Global Change Biology*, 9, 161-185, 2003.**

**Christensen, T. et al.: Methane flux from northern wetlands and tundra, Tellus, 48B, 652-661, 1996.**

*L220: It would be good to see a map of these biogenic fluxes, comparable to Figure 2. Are they sensible? Has the WRF-GHG soil moisture/temperature been evaluated?*

**Unlike anthropogenic emissions which are static fields externally prepared (and read in during simulation), the biogenic fluxes are calculated online based on the approaches of Christensen et al. (1996) and Sanderson (1996) for wetlands and termites, respectively, and on Ridgwell et al. (1999) for soil uptake, the only terrestrial sink of methane. A brief description on how these biogenic fluxes are calculated can be found in section 2.2.2. The description of methane emissions from wetlands was rewritten as suggested in the previous comment, and a map of biogenic fluxes for May 2018 similar to Figure 2 is now included in the manuscript. The WRF-GHG parameters soil moisture and soil temperature have not been evaluated. Model evaluation (and improvement) for this kind of parameters is usually made using observational data from field campaigns.**

**Christensen, T. et al.: Methane flux from northern wetlands and tundra, Tellus, 48B, 652-661, 1996.**

**Ridgwell, A. J. et al.: Consumption of atmospheric methane by soils: A process-based model, Global Biochem. Cy., 13, 59-70, 1999.**

**Sanderson, M. G.: Biomass of termites and their emissions of methane and carbon dioxide: A global database, Global Biochem. Cy., 10, 543-557, 1996.**

*L235: This is lacking detail. What were the test permutations for the parameterisations? What was the final configuration?*

To choose between the diverse physics schemes and initial and boundary conditions for methane background concentrations, eight model test runs were made by permuting the cumulus cloud schemes Grell-Freitas and Kain-Fritsch, the planetary boundary layer schemes MYJ and YSU, and initial and boundary conditions from the CAM-chem and CAMS models. All the other physics (see Table 2.1 in Beck et al. (2011)), chemistry, and emission schemes remained constant all over the model simulations, with the final configuration being shown in Table 2 (page 10 in the manuscript).

Beck, V. et al.: The WRF Greenhouse Gas Model (WRF-GHG), Technical Report No. 25, Max Planck Institute for Biogeochemistry, Jena, Germany, 2011.

*L338: What are the implications of this regridding? What was the approach taken for the averaging kernel and a priori information? More details are needed.*

As briefly mentioned in the manuscript (lines 525-527), regridding techniques can potentially produce data gaps when applied to sparse data, thus reducing the number of grid points, especially when regridding from high-resolution to low-resolution. In our case, the regridding techniques bilinear, conservative and nearest neighbour (source to destination) were used to regrid the satellite data (5.5km×7km) to the WRF-GHG grid (30km×30km), with all of them producing similar results. The a priori information, averaging kernel, and all the other satellite parameters used to calculate the total column concentrations were regridded using the three techniques previously mentioned, with the bilinear method being finally selected as it preserves the original fine grid structure best.

*Figure 3: Missing units. A single colourbar could be used (it's just repeated).*

Figures 3, 4 and 5 now include the units and also a single colorbar.

*Figure 3: The ICOS data all looks to have similar values throughout the year with very little variability compared to the simulations.*

**Yes, exactly. This can be also seen in Figure S1 in the Supplement. The high variability in the simulated concentrations near the surface is strongly tied to the anthropogenic emissions – note that the methane variability from background signals is quite similar to that from ICOS observations. The influence of anthropogenic emissions on methane concentrations diminishes gradually with increasing height, as expected.**

*L394: I don't believe this is true (but I could be wrong). Specifically I'm thinking of Tsuruta et al. (2023) who state "Anthropogenic fluxes, such as those from agriculture, landfills and production and use of oil, gas and coal, are taken from the EDGAR v6.0 inventory".*

**Yes, Tsuruta et al. (2023) used EDGARv6.0 for anthropogenic fluxes. This work had not been included/cited in the discussion section because it was not available by the time when we submitted our manuscript to GMD. The sentence in lines 394-395 was removed and new discussions on Tsuruta et al. (2023) results have now been included in several parts throughout the manuscript.**

**“...anthropogenic sources. No inverse modeling studies of CH<sub>4</sub> emissions based entirely on EDGARv6.0 for anthropogenic sources have been conducted over Europe. However, a recent inversion approach for CH<sub>4</sub> emissions over China...” → “...anthropogenic sources. Using EDGARv6.0 CH<sub>4</sub> fluxes as the a priori emission estimates and two sets of TROPOMI-based XCH<sub>4</sub> observations, the global inversion approach conducted by Tsuruta et al. (2023) showed that over central Europe the anthropogenic CH<sub>4</sub> emissions would be slightly overestimated, mainly during spring and autumn. However, higher**

emission estimates are otherwise found when ground-based data is used to drive the inversion estimates. The inversion approach for CH<sub>4</sub> emissions over China...

“XCH<sub>4</sub> signals from natural sources (wetlands and termites) and biomass burning were not relevant during the study period. According to Kaplan (2002), potential natural wetlands in the 30 km modeling domain concentrate over the Baltic countries, Belarus and western regions of Russia. Among the factors that could have negatively influenced the accumulation of biospheric CH<sub>4</sub> in the atmosphere over the study region are: a less CH<sub>4</sub> formation tied to the extremely dry season in summer 2018 over central and northern Europe (Rousi et al., 2022); a CH<sub>4</sub> compensation by soil uptake processes; and transport mechanisms.” → “XCH<sub>4</sub> signals from natural sources (wetlands and termites) and biomass burning were not relevant during the study period. The inversion estimates conducted by Tsuruta et al. (2023) showed that, compared to the anthropogenic emissions, the wetland emissions over central Europe are small, mainly during summer months when biogenic fluxes reached their minimum values. According to Kaplan (2002), potential natural wetlands in the 30 km modeling domain concentrate over the Baltic countries, Belarus and western regions of Russia. Among the factors that could have negatively influenced the accumulation of biospheric CH<sub>4</sub> in the atmosphere over the study region are: a less CH<sub>4</sub> formation tied to the extremely dry season in summer 2018 over central and northern Europe (Rousi et al., 2022); a CH<sub>4</sub> compensation by soil uptake processes as the fluxes are dominated by mineral soils which are mostly net sink of CH<sub>4</sub> (Tsuruta et al., 2023); and transport mechanisms.”

**Kaplan, J. O.: Wetlands at the last Glacial Maximum: Distribution and methane emissions, *Geophys. Res. Lett.*, 29, 1079, 2002.**



**Rousi, E. et al.: The extremely hot and dry 2018 summer in central and northern Europe from a multi-faceted weather and climate perspective, EGU sphere, doi:10.5194/egusphere-2022-813, 2022.**

**Tsuruta, A. et al.: CH<sub>4</sub> Fluxes Derived from Assimilation of TROPOMI XCH<sub>4</sub> in CarbonTracker Europe-CH<sub>4</sub>: Evaluation of Seasonality and Spatial Distribution in the Northern High Latitudes, Remote Sensing, 15, 1620, doi:10.3390/rs15061620, 2023.**

*L495: This comes back to why this time period specifically was selected and also the point earlier about how some of the fluxes were calculated (e.g. wetland emissions).*

**The one-year period from April 01, 2018 to March 31, 2019 was selected because of the following reasons: 1) availability of TROPOMI operational data and the improved TROPOMI data from March 2018 onwards; 2) evaluate the most recent EDGARv6.0 emissions for methane (2018); and 3) avoid sustained irregular situations in terms of emissions, e.g., fire outbreaks in most part of 2019 and emission reductions associated with COVID-19 lockdowns in 2020 and 2021, both at global scale. The sentence on how wetland emissions are calculated in WRF-GHG is now better described in the manuscript (see comment L213's response)**

*L519: The modelled stratosphere can play a significant role and I don't see a mention of that. Has any attempt been made to assess how well the modelled stratosphere performs (e.g. by comparison to profile observations or other sources)?*

**As this first part aims to evaluate the WRF-GHG model for a one-year simulation period, special focus has been given to platforms that continuously measure methane concentrations such as ICOS and TROPOMI. Model evaluation of methane vertical**

profiles in the stratosphere is usually performed using observations from meteorological balloons, spectrometers and aircrafts. Aircraft observations are especially suited for studying the troposphere-stratosphere exchange as they regularly reach high altitudes.

For the one-year study period from April 01, 2018 to March 31, 2019, methane data from meteorological balloons and COCCON spectrometers as those used by Tsuruta et al. (2023) and Tu et al. (2020), respectively, are available for most of 2018 over the European Arctic region, out of the AUMIA modeling domain. On the other hand, a total of approximately 55 h of high-frequency aircraft observations of methane between May and June 2018 were obtained aboard HALO in the scope of the CoMet 1.0 campaign. Observations were performed at altitudes ranging from 50 m up to 14 km above mean sea level (Gałkowski et al., 2021). This lack of sufficient vertical information hampers to perform any model evaluation of the stratospheric methane, with most of the methane modeling studies using space observations to evaluate their total column (troposphere+stratosphere) concentrations.

Gałkowski, M. et al.: In situ observations of greenhouse gases over Europe during the CoMet 1.0 campaign aboard the HALO aircraft, *Atmos. Meas. Tech.*, **14**, 1525-1544, 2021.

Tsuruta, A. et al.: CH<sub>4</sub> Fluxes Derived from Assimilation of TROPOMI XCH<sub>4</sub> in CarbonTracker Europe-CH<sub>4</sub>: Evaluation of Seasonality and Spatial Distribution in the Northern High Latitudes, *Remote Sensing*, **15**, 1620, doi:10.3390/rs15061620, 2023.

Tu, Q. et al.: Atmospheric CO<sub>2</sub> and CH<sub>4</sub> abundances on regional scales in boreal areas using CAMS reanalysis, COCCON spectrometers and Sentinel-5 Precursor satellite observations, *Atmospheric Measurement Techniques*, **13**, 4751-4771, 2020.

*Figure 6 – Caption: I think the “respectively” needs to be moved outside of the brackets as I think it also applies to panels a/e.*

**The “respectively” in Figure 6 caption only applies to panels b and f which represent XCH<sub>4</sub> fields with and without smoothing. Both the panels a and e represent the same temporal mean spatial distributions of TROPOMI XCH<sub>4</sub> concentrations over the study period.**

*Figure 6: Panels C/G – This difference is dominated by the offset and there’s very little spatial structure visible (i.e. it’s all light red or all light blue). It may be more informative to centre the colourbar around the average and lessen the range to enhance spatial details.*

**Given that we want to quantify how much higher or lower the two sets of model concentrations (with and without smoothing) are with regard to the same satellite estimates, we think that the choice of maps of relative (or absolute, e.g. see Figs 5 and 6 in Tsuruta et al. 2023) differences with the colormap centered on zero facilitates the quantitative analysis and provides a much more consistent baseline for the comparison. A colormap centering on the average is also a good option although simultaneous visualization of different data imbalances would be more difficult to interpretate.**

**Tsuruta, A. et al.: CH<sub>4</sub> Fluxes Derived from Assimilation of TROPOMI XCH<sub>4</sub> in CarbonTracker Europe-CH<sub>4</sub>: Evaluation of Seasonality and Spatial Distribution in the Northern High Latitudes, Remote Sensing, 15, 1620, doi:10.3390/rs15061620, 2023.**
